# Supplementary material
Source: PubMed Central journal article supplement (PMC521968)

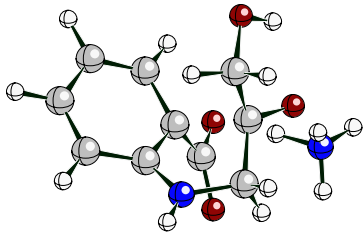

**(I)**

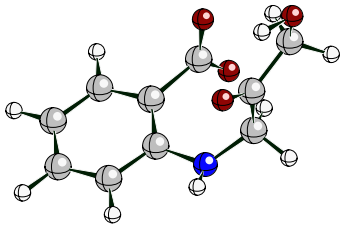

**(II)**

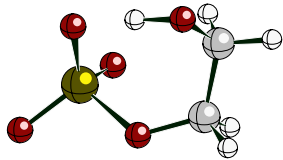

**(III)**

Supplement: pnas_101_40_14379__1.pdf [file pnas_101_40_14379__1.pdf]

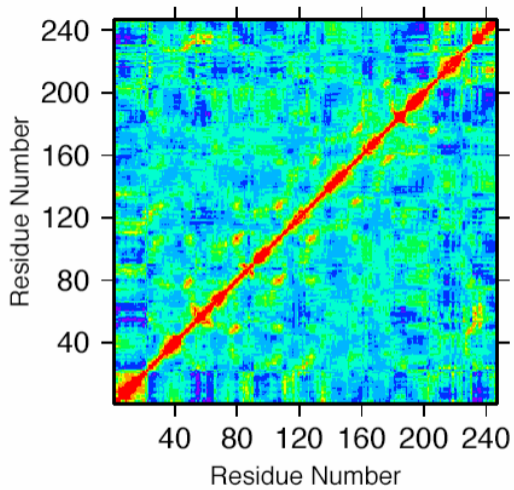

**E·S298**

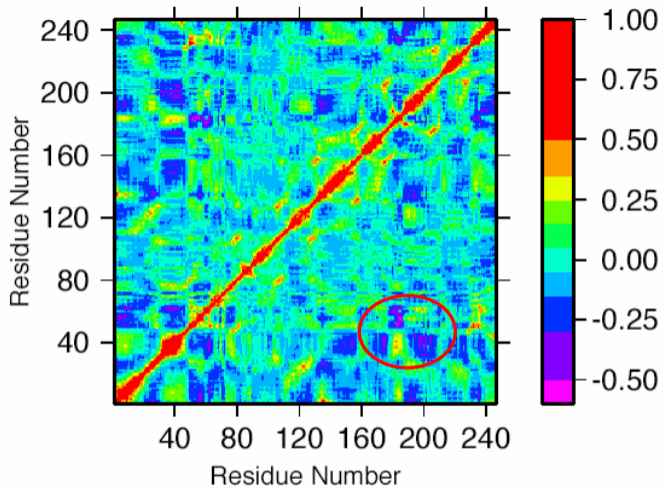

**E·S385**

Supplement: pnas_101_40_14379__3.pdf [file pnas_101_40_14379__3.pdf]
